# Supplementary material for: UP256 Inhibits Hyperpigmentation by Tyrosinase Expression/Dendrite Formation via Rho-Dependent Signaling and by Primary Cilium Formation in Melanocytes
Source: Int J Mol Sci. 2020 Jul 28;21(15):5341. doi: 10.3390/ijms21155341 (PMC7432859; doi:10.3390/ijms21155341)
Supplement: Supplementary file 1 [file ijms-21-05341-s001.pdf]

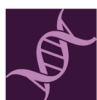

1    **Supplementary:**

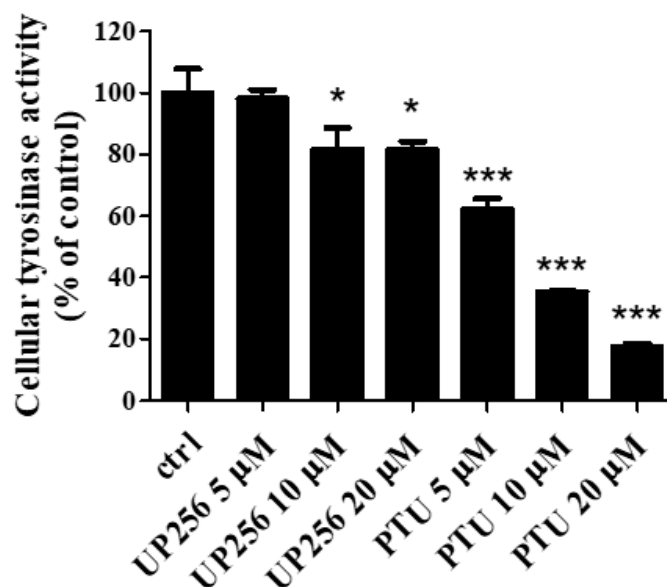

2    **Figure S1.** Effects of UP256 on the cellular tyrosinase activity in melanocytes. after incubation,  
3    tyrosinase activity was evaluated using l-DOPA oxidation assay

4

5

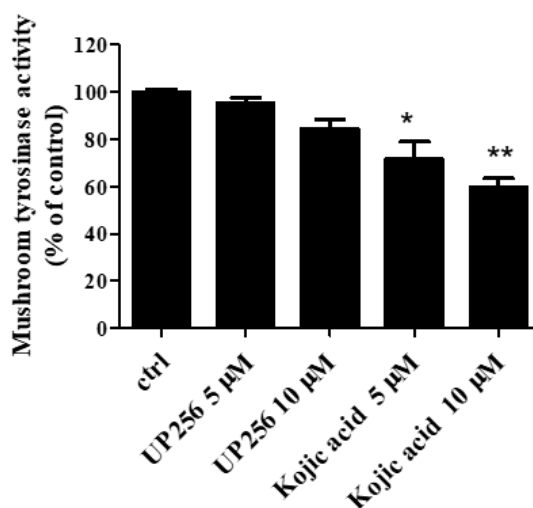

6    **Figure S2.** Effects of UP256 on mushroom Tyrosinase activity. For the measurement of mushroom  
7    Tyrosinase activity, sample and L-DOPA were mixed with mushroom Tyrosinase. Kojic acid was  
8    used as a positive control.

9

10

11

12

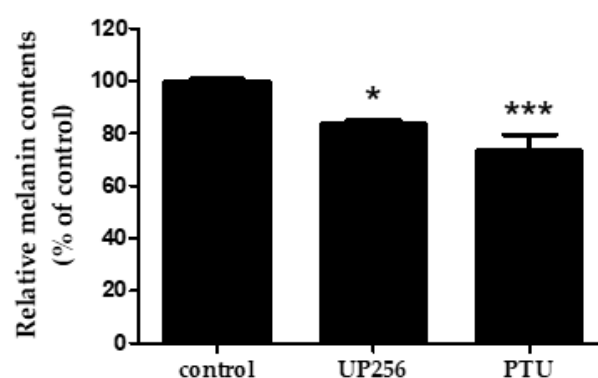

**Figure S3.** Relative melanin content in the zebrafish embryos. Synchronized zebrafish embryos were treated with 30  $\mu$ M UP256 and PTU and observed under a stereomicroscope after 72 h.

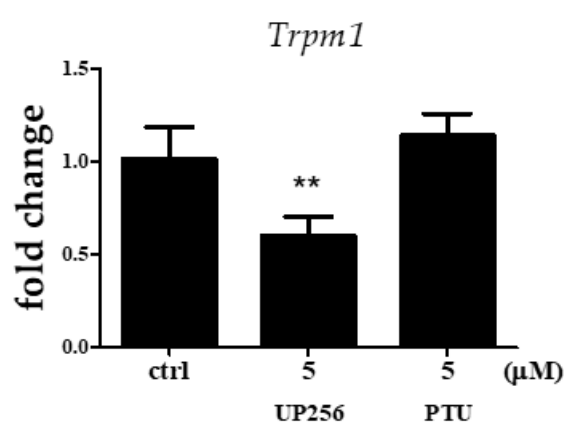

**Figure S4.** Effects of UP256 on expression of *Trpm1* mRNA in melanocytes. Expression levels were calculated by quantitative real-time PCR analysis. GAPDH gene was used as internal reference gene and the  $\Delta\Delta$  CT method was used for relative quantification.
